# Supplementary material for: Oxygen functional groups induced formation of Cu2O nanoparticles on the surface of reduced graphene oxide
Source: Royal Society of Chemistry journal article supplement (doi:10.1039/c3nj00444a), 2013-01-01
Supplement: c3nj00444a.pdf [file c3nj00444a.pdf]

# **Oxygen functionalities of graphene oxide: effects on the formation of nanoparticles on graphene**

## **(Supporting Information)**

**Yansong Zhou, Gang Chen,\* Yaoguang Yu, Linxing Hao, Zhonghui Han and Qilin Yu**

Department of Chemistry, Harbin Institute of Technology, Harbin, 150001, PR China.

E-mail: gchen@hit.edu.cn; Fax: +86-451-86403117; Tel: +86-451-86403117;

zys2011s@sina.com

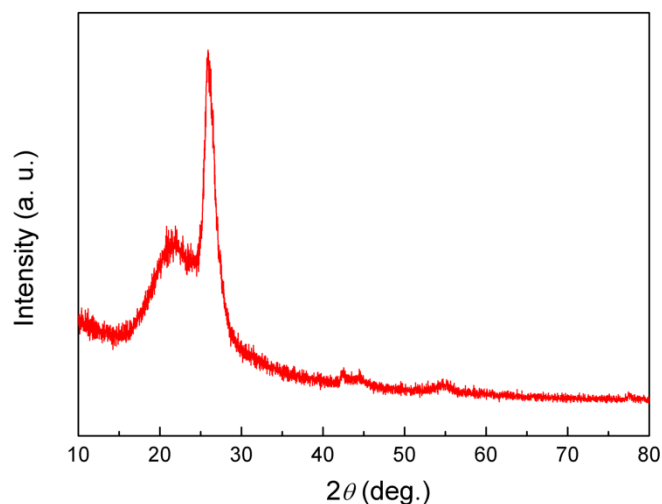

Fig. S1 XRD pattern of mGO. A broad peak at 21.5° corresponds to the low oxygenated level of graphite. A sharp peak at about 24.6° indicates the incompletely oxidation of graphite during the oxidation process.

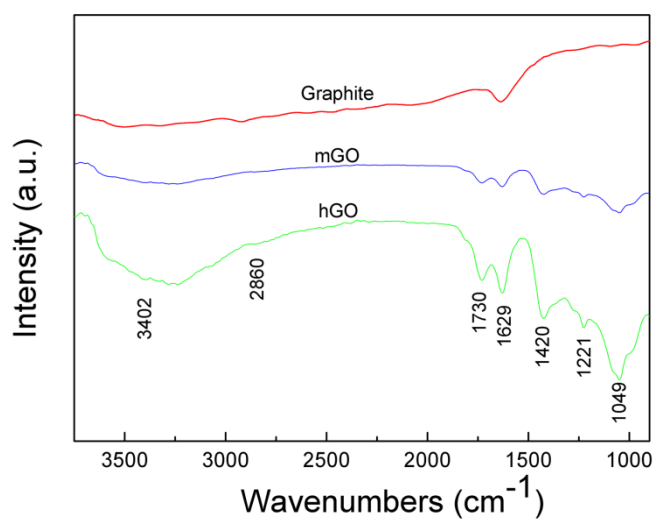

Fig. S2 FTIR spectra of graphite, mGO and hGO. The different intensity of peaks between the mGO and hGO indicates the difference oxygenated levels between mGO and hGO. Only a clear peak at 1629 cm<sup>-1</sup> corresponds to the aromatic structure of graphite.

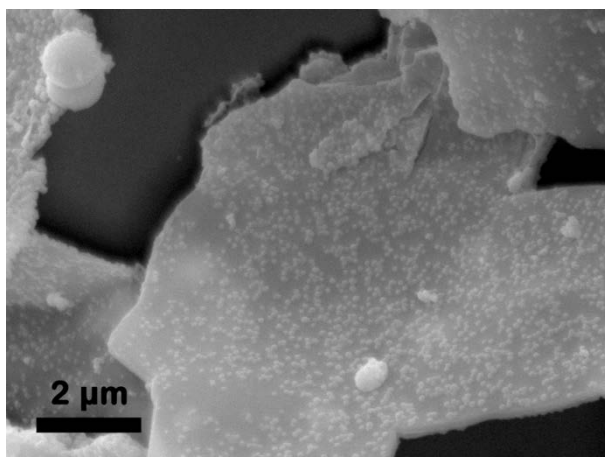

Fig. S3 SEM image of Cu<sub>2</sub>O/rmGOs. Cu<sub>2</sub>O particles spread uniformly on the mGO sheet surface and few microspheres connecting to mGO directly surface were also observed.

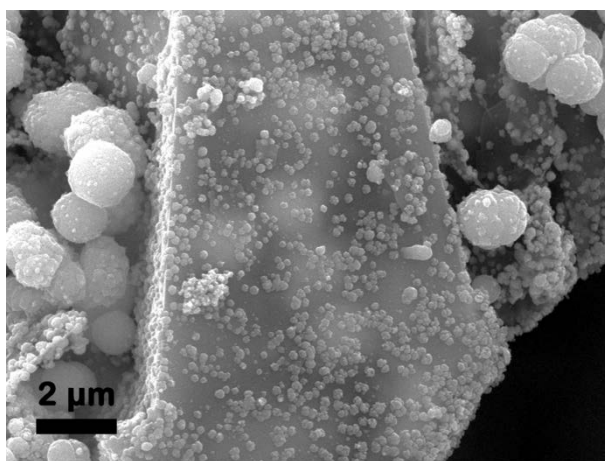

Fig. S4 SEM image of Cu<sub>2</sub>O/PG. Homogeneously Cu<sub>2</sub>O particles covered graphite sheet was shown. No Cu<sub>2</sub>O microspheres that connected directly to graphite sheet were observed. However, a lot of individual Cu<sub>2</sub>O microspheres were also shown in this sample.

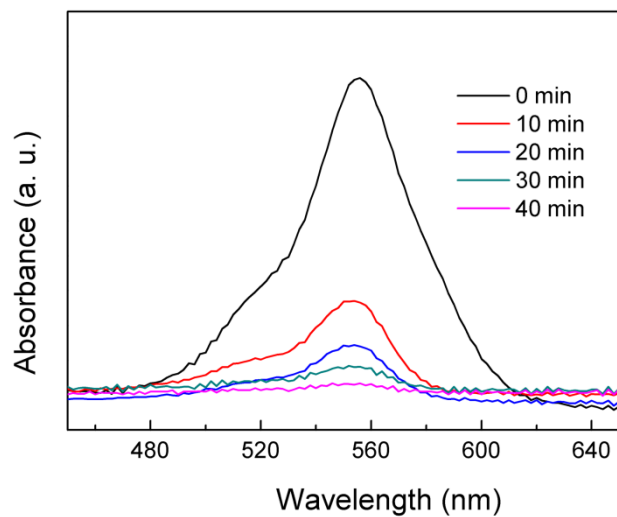

Fig. S5 Temporal UV-vis absorption spectral changes observed for the RhB solution. The absorbance rapidly decreased, indicating RhB was degraded gradually as the reaction time prolonged.
